# Supplementary material for: Type 2 Innate Lymphoid Cells Induce CNS Demyelination in an HSV-IL-2 Mouse Model of Multiple Sclerosis
Source: PubMed Central journal article supplement — iScience. 2020 Sep 10;23(10):101549. doi: 10.1016/j.isci.2020.101549 (PMC7522755; doi:10.1016/j.isci.2020.101549), 2020-09-10
Supplement: mmc1.pdf [file mmc1.pdf]

**iScience, Volume 23**

## **Supplemental Information**

**Type 2 Innate Lymphoid Cells Induce**

**CNS Demyelination in an HSV-IL-2**

**Mouse Model of Multiple Sclerosis**

**Satoshi Hirose, Pedram Shafiei Jahani, Shaohui Wang, Ujjaldeep Jaggi, Kati Tormanen, Jack Yu, Mihoko Kato, Omid Akbari, and Homayon Ghiasi**

## 1 STAR★Methods

## 2 Key Resources Table

| REAGENT or RESOURCE                           | SOURCR                  | IDENTIFIER     |
|-----------------------------------------------|-------------------------|----------------|
| <b>Antibodies</b>                             |                         |                |
| Biotin-conjugated anti-mouse CD3e (145-2C11)  | BioLegend               | Cat#100304     |
| Biotin-conjugated anti-mouse CD5 (53-7.3)     | BioLegend               | Cat#100604     |
| Biotin-conjugated anti-mouse CD45R (RA3-6B2)  | BioLegend               | Cat#103204     |
| Biotin-conjugated anti-mouse Gr-1 (RB6-8C5)   | BioLegend               | Cat#108404     |
| Biotin-conjugated anti-mouse CD11c (N418)     | BioLegend               | Cat#117304     |
| Biotin-conjugated anti-mouse CD11b (M1/70)    | BioLegend               | Cat#101204     |
| Biotin-conjugated anti-mouse Ter119 (TER-119) | BioLegend               | Cat#116204     |
| Biotin-conjugated anti-mouse FcεR1a (MAR-1)   | BioLegend               | Cat#134304     |
| Biotin-conjugated anti-mouse TCR-gd (eBioGL3) | ThermoFisher Scientific | Cat#13-5711-82 |
| PECy7-conjugated anti-mouse CD127 (A7R34)     | BioLegend               | Cat#135014     |
| APCCy7-conjugated anti-mouse CD45 (30-F11)    | BioLegend               | Cat#103116     |

|                                                       |                                                                   |               |
|-------------------------------------------------------|-------------------------------------------------------------------|---------------|
| PE-conjugated anti-mouse ST2 (DIH9)                   | BioLegend                                                         | Cat#145303    |
| anti-mouse CD16/32 (93)                               | BioLegend                                                         | Cat#101302    |
| Alexa Fluor 488-conjugated anti-mouse IL-2 (JES6-5H4) | BioLegend                                                         | Cat#503813    |
|                                                       |                                                                   |               |
| <b>Bacterial and Virus Strains</b>                    |                                                                   |               |
| LAT2903                                               | Homayon Ghiasi, Cedars-Sinai Medical Center (Perng et al., 1994)  | N/A           |
| HSV-IL-2                                              | Homayon Ghiasi, Cedars-Sinai Medical Center (Ghiasi et al., 2002) | N/A           |
|                                                       |                                                                   |               |
| <b>Chemicals, Peptides, and Recombinant Proteins</b>  |                                                                   |               |
| Minimum Essential Medium (MEM)                        | Corning                                                           | Cat#10-010-CV |
| Fetal Bovine Serum (FBS)                              | Omega Biosciences                                                 | Cat#FB-02     |
| Mouse recombinant IL-33                               | BioLegend                                                         | Cat#580508    |
| Streptavidin-FITC                                     | BioLegend                                                         | Cat#405202    |
| Prolong Gold Antifade Mountant with DAPI              | ThermoFisher Scientific                                           | Cat#P36931    |
| O.C.T. compound                                       | Sakura Finetek                                                    | Cat#4583      |
| Trizol reagent                                        | ThermoFisher Scientific                                           | Cat#15596026  |
| <b>Critical Commercial Assays</b>                     |                                                                   |               |
| High-Capacity cDNA Reverse Transcription Kit          | ThermoFisher Scientific                                           | Cat#4368813   |

|                                                         |                                                                         |                                                                                       |
|---------------------------------------------------------|-------------------------------------------------------------------------|---------------------------------------------------------------------------------------|
|                                                         |                                                                         |                                                                                       |
| <b>Experimental Models: Cell Lines</b>                  |                                                                         |                                                                                       |
| Rabbit skin (RS) cells                                  | Homayon Ghiasi, Cedars-Sinai Medical Center (Perng et al., 1994)        | N/A                                                                                   |
|                                                         |                                                                         |                                                                                       |
| <b>Experimental Models: Organisms/Strains</b>           |                                                                         |                                                                                       |
| Mouse: C57BL/6                                          | Jackson Laboratory                                                      | Stock#000664                                                                          |
| Mouse: IL-2r $\alpha$ <sup>-/-</sup>                    | Jackson Laboratory                                                      | Stock#002952                                                                          |
| Mouse: IL-2r $\beta$ <sup>-/-</sup>                     | Jackson Laboratory                                                      | Stock#002816                                                                          |
| Mouse: IL-2r $\gamma$ <sup>-/-</sup>                    | Jackson Laboratory                                                      | Stock#003174                                                                          |
| Mouse: ILC1 <sup>-/-</sup>                              | Jackson Laboratory                                                      | Stock#004648                                                                          |
| Mouse: ILC2 <sup>-/-</sup>                              | Dr. ANJ Mackenzie (MRC Laboratory of Molecular Biology, United Kingdom) | N/A                                                                                   |
| Mouse: ILC3 <sup>-/-</sup>                              | Jackson Laboratory                                                      | Stock#007571                                                                          |
|                                                         |                                                                         |                                                                                       |
| <b>Oligonucleotides</b>                                 |                                                                         |                                                                                       |
| TaqMan Gene Expression Assay, see Materials and methods | ThermoFisher Scientific                                                 | Cat#4331182                                                                           |
|                                                         |                                                                         |                                                                                       |
| <b>Software and Algorithms</b>                          |                                                                         |                                                                                       |
| Graphpad Prism (ver. 4)                                 | Graphpad                                                                | N/A                                                                                   |
| Connect Data Analysis Apps                              | ThermoFisher Scientific                                                 | <a href="https://www.thermofisher.com/us/en/">https://www.thermofisher.com/us/en/</a> |

|  |  |                                                                                      |
|--|--|--------------------------------------------------------------------------------------|
|  |  | home/digital-<br>science/thermo-<br>fisher-connect/all-<br>analysis-<br>modules.html |
|--|--|--------------------------------------------------------------------------------------|

3

4

## Experimental Model and Subject Details

5

6

7

8

9

**Cells and Virus.** Rabbit skin (RS) cells were generated in our laboratory, prepared, grown in minimal essential medium (MEM) media plus 5% FBS and used as described previously (Perng et al., 1994). Plaque-purified HSV-1 recombinant virus expressing IL-2 (HSV-IL-2) and parental virus for HSV-IL-2 (LAT2903) were grown in RS cell monolayers in MEM containing 5% fetal calf serum, as we described previously (Ghiasi et al., 2002a; Ghiasi et al., 2001, 2002b).

10

11

12

13

14

15

16

17

18

19

**Mice.** Inbred IL-2 $\alpha^{-/-}$ , IL-2 $\beta^{-/-}$ , IL-2 $\gamma^{-/-}$ , ILC1 $^{-/-}$ , and ILC3 $^{-/-}$  mice were obtained from the Jackson Laboratory (Bar Harbor, ME), ILC2 $^{-/-}$  mice were a gift from Andrew McKenzie (MRC Laboratory of Molecular Biology, Cambridge Biomedical Campus, United Kingdom) and described previously (Halim et al., 2018; Rafei-Shamsabadi et al., 2018). All mice have a B6 background and were bred in-house. WT C57BL/6 mice were used as a control. Only female mice (6 to 8-wk-old) were used in the study due to more resistance of male mice to CNS demyelination (Zandian et al., 2009). All animal procedures were performed in strict accordance with the Association for Research in Vision and Ophthalmology Statement for the Use of Animals in Ophthalmic and Vision Research and the NIH *Guide for the Care and Use of Laboratory Animals* (ISBN 0-309-05377-3). The animal research protocol was approved by the Institutional Animal Care and Use Committee of Cedars-Sinai Medical Center (Protocol #6134).

20

21

22

23

24

**Ocular Infection.** Female mice were infected ocularly with  $2 \times 10^5$  PFU per eye of HSV-IL-2 or parental virus, in 2 $\mu$ l of tissue culture media as an eye drop without corneal scarification as we have described previously (Hirose et al., 2019; Mott et al., 2015). The presence of infectious virus in the eye of ocularly infected mice on days 1-5 post infection and the presence of viral DNA on day 14 post infection were monitored by PCR. Infectious virus was detected in all infected mice (not shown).

25 **Analysis of demyelination using Luxol Fast Blue (LFB) staining.** The presence or absence of  
26 demyelination in ON, SC, and brains of infected mice was evaluated using LFB staining of formalin-fixed  
27 sections of ON, SC, and brain as we described previously (Osorio et al., 2005). Every 4th section of ON,  
28 SC, and brain was stained with LFB. The number of plaques, size of plaques, and shape of plaques on  
29 multiple fields were evaluated by investigators who were blinded to the treatment groups using serial  
30 sections of CNS tissues. The amount of myelin loss in the stained sections of brains, SCs and ONs was  
31 measured using the NIH Image J software analysis system. The areas of demyelination (clear-white) to  
32 normal tissue (blue) were quantified using 150 random sections from the brain and SCs or 30 sections  
33 from ONs of each animal. Demyelination in each section was confirmed by monitoring adjacent sections.  
34 The percentage of myelin loss was calculated by dividing the lesion size into the total area for each section.

35 **Isolation of type 2 ILCs.** C57BL/6 mice were intraperitoneally treated with recombinant mouse  
36 (rm)IL-33 (IP; 1µg/mouse, BioLegend, San Diego, CA) for three days. On the fourth day, BM cells were  
37 collected from the femur and tibia and resuspended in phosphate buffered saline (PBS) solution  
38 containing 0.5% bovine serum albumin and 2 mM ethylenediaminetetraacetic acid (EDTA). BM ILC2s  
39 were stained based on the lack of expression of classical lineage markers (CD3e, CD5, CD45R, Gr-1,  
40 CD11c, CD11b, Ter119, TCRγδ, and FcεRI) and positive expression of CD45, ST2, and CD127 as  
41 previously described (Hirose et al., 2019; Hurrell et al., 2019; Rigas et al., 2017). The following mouse  
42 antibodies were used: biotinylated anti-mouse lineage CD3e (145-2C11), CD5 (53-7.3), CD45R (RA3-  
43 3B2), Gr-1 (RB6-8C5), CD11c (N418), CD11b (M1/70), Ter119 (TER-119), FcεRIa (MAR-1) (BioLegend)  
44 and TCR-gad (eBioGL3) (eBioscience). Streptavidin-FITC, PE-Cy7 anti-mouse CD127 (A7R34),  
45 APCCy7 anti-mouse CD45 (30-F11) were purchased from BioLegend. ILC2s were FACS purified using  
46 BD FACS ARIA III (BD Biosciences, San Jose, CA) with purity of >95%.

47 **Immunostaining of ILC2.**  $5 \times 10^4$  ILC2 cells per tube were seeded in 5ml polystyrene round-  
48 bottom tube (Corning, Corning, NY) and infected with 10 PFU/cell of HSV-IL-2, parental virus or mock  
49 infected for 24 h. The cells were washed with staining buffer (cold PBS supplemented with 2% fetal calf  
50 serum and 0.05% sodium azide), and preincubated with anti-mouse CD16/32 (BioLegend) for 15 min.,  
51 then incubated with anti-mouse IL-2 antibody conjugated with Alexa Fluor 488 (BioLegend) for 30 min.,

52 then washed once with staining buffer. Cells were fixed with 4 % paraformaldehyde in PBS for 10 min. at  
53 room temperature and then washed with staining buffer. Cells were mounted onto slide glass with  
54 Prolong Gold Antifade Mountant (ThermoFisher Scientific, Waltham, MA). The fluorophores were imaged  
55 by confocal microscopy using a Leica SP5-X confocal microscope, image acquisition and data analysis  
56 system (Leica Microsystems, Buffalo Grove, IL).

57 **Adoptive transfer of ILC2s.** To confirm the effect of ILC2s on CNS demyelination, ILC2s were  
58 isolated from bone-marrow of WT mice as described above and previously (Hirose et al., 2019). Each  
59 recipient ILC2<sup>-/-</sup> mouse was injected intravenously (IV) once with 1 X 10<sup>5</sup> ILC2s in MEM (100 µl). Mice  
60 were then infected ocularly with HSV-IL-2 virus two wk after transfer of the ILC2s.

61 **RNA Extraction, cDNA Synthesis and TaqMan RT-PCR.** Brains were collected from naive mice  
62 and mice that survived ocular infection on day 14 PI and individual brains were embedded in O.C.T.  
63 compound (Sakura Finetek, Tokyo, Japan), quickly frozen with dry ice, and stored at -80°C until  
64 sectioning. Brains were sectioned with Microm HM550 cryostat microtome (ThermoFisher) at 9 µm  
65 thickness, -18°C and 20 to 40 sections were collected in a 2ml sample tube. 0.5 ml Trizol reagent  
66 (ThermoFisher) was added and samples were stored at -80°C until processing. Tissue processing, total  
67 RNA extraction, and RNA yield were performed as we have described previously (Mott et al., 2007a;  
68 Mott et al., 2007b). Following RNA extraction, 1000 ng of total RNA was reverse-transcribed using  
69 random hexamer primers and recombinant Molony Murine Leukemia Virus Reverse Transcriptase from  
70 the High Capacity cDNA Reverse Transcription Kit (Thermo Fisher Scientific) according to the  
71 manufacturer's recommendations. The levels of various RNAs were evaluated using commercially  
72 available TaqMan Gene Expression Assays (Thermo Fisher Scientific) with optimized primer and probe  
73 concentrations. Primer probe sets consisted of two unlabeled PCR primers and the FAM<sup>TM</sup> dye-labeled  
74 TaqMan MGB probe formulated into a single mixture. All cellular amplicons also included an intron-exon  
75 junction to eliminate signal from genomic DNA contamination. The assays used in this study were as  
76 follows: 1) PD-1 (programmed death 1) ABI assay I.D. Mm00435532\_m1 – Amplicon size 65 bp; 2) GM-  
77 CSF (Csf2 – colony stimulating factor 2 (granulocyte-macrophage)) ABI Mm01290062\_m1 – Amplicon  
78 size 125 bp; 3) IL-5 (interleukin 5) ABI Mm00439646\_m1 – Amplicon size 62 bp; 4) IL-6 (interleukin 6)

79 ABI Mm00446190\_m1 – Amplicon size 78 bp; 5) IFN $\gamma$ 1 (interferon gamma receptor 1)  
80 Mm00599890\_m1 – Amplicon size 85 bp; 6) RANTES (CCL5 – chemokine (C-C motif) ligand 5) ABI  
81 Mm01302427\_m1 - Amplicon size 103 bp; 7) CXCL10 (chemokine (C-X-C motif) ligand 10) ABI  
82 Mm00445235\_m1 – Amplicon size 59 bp; 8) 4-1BB (Tnfrsf9 – tumor necrosis factor receptor  
83 superfamily, member 9) ABI Mm00441899\_m1 – Amplicon size 71 bp; 9) Hif1 $\alpha$  (hypoxia inducible factor  
84 1, alpha subunit) ABI Mm00468869\_m1 – Amplicon size 75 bp; 10) Csf2rb (colony stimulating factor 2  
85 receptor, beta, low-affinity (granulocyte-macrophage)) ABI Mm00655745\_m1 – Amplicon size 125 bp;  
86 11) TIM3 (Havcr2 – hepatitis A virus cellular receptor 2) ABI Mm00454540\_m1 – Amplicon size 98 bp;  
87 12) CTLA4 (cytotoxic T-lymphocyte-associated protein 4) ABI Mm00486849\_m1 – Amplicon size 71 bp  
88 and 13) GAPDH used for normalization of transcripts, ABI Mm999999.15\_G1 – Amplicon size 107 bp.

89 Quantitative real-time RT-PCR (qRT-PCR) was performed using QuantStudio 5 System (Thermo  
90 Fisher Scientific, Waltham, MA) in 384-well plates as described previously (Mott et al., 2007a; Mott et al.,  
91 2007b). The threshold cycle (CT) values, which represent the PCR cycles at which there is a noticeable  
92 increase in the reporter fluorescence above baseline, were determined using Applied Biosystems qPCR  
93 software (Thermo Fisher Scientific).

94 **Statistical analyses.** Student's t test and ANOVA were performed using the computer program  
95 Prism (GraphPad, San Diego, CA). Results were considered statistically significant when the "P" value  
96 was <0.05.

97
